# Supplementary material
Source: Springer Nature journal article supplement (https://www.springermedizin.de/resource/supplementary/12913_2011_2401_MOESM4_ESM.pdf/9529778)

**TKR, hospital perspective**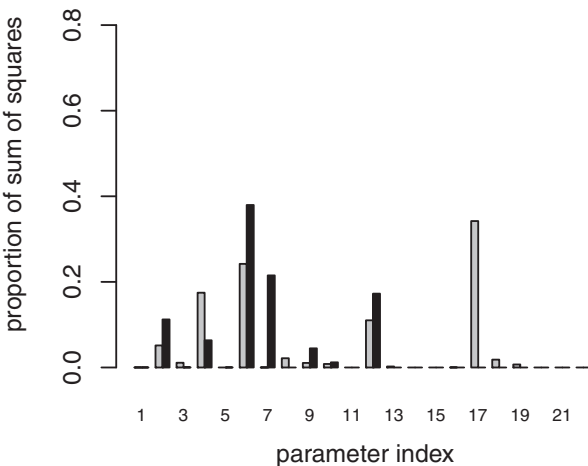**TKR, SHI perspective**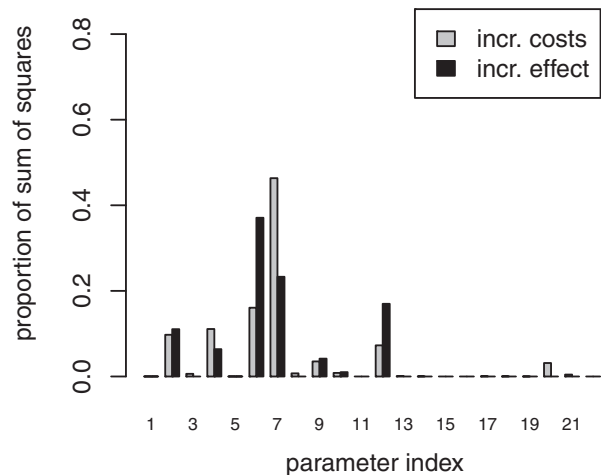**THR, hospital perspective**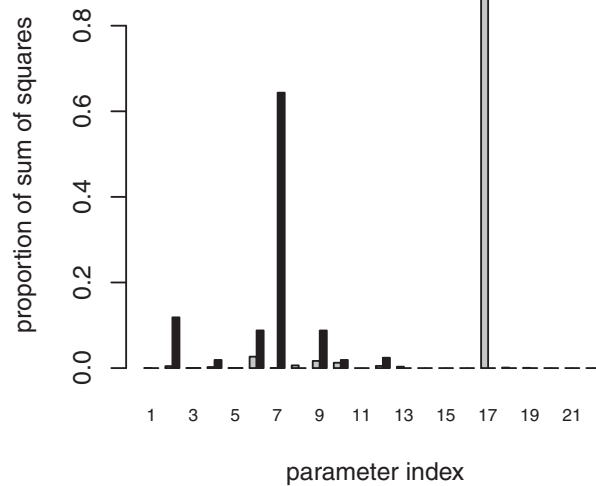**THR, SHI perspective**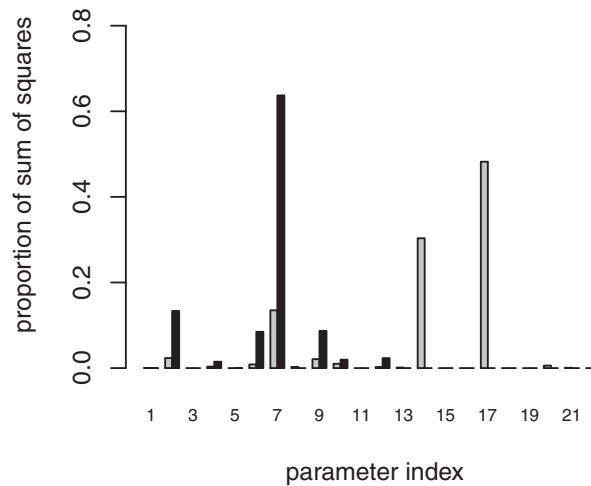

Supplement: MOESM4 [file 9529778]
